# Supplementary material
Source: MDPI journal article supplement (https://www.mdpi.com/2073-4395/10/5/741)
Supplement: s1 [file s1]

**Supplementary Table 1.** Muskmelon and sweet pepper. Examples of the nutrient solution applied to the conventionally managed treatments in muskmelon and sweet pepper crops. In the nutrient solutions applied to the improved management treatments, the NO<sub>3</sub><sup>-</sup>, Ca<sup>2+</sup> and K<sup>+</sup> concentrations were lower.

| Crop         | Nutrient                             |                                                     |                                       |                                       |                         |                                      |                        |                          |                          |                         |
|--------------|--------------------------------------|-----------------------------------------------------|---------------------------------------|---------------------------------------|-------------------------|--------------------------------------|------------------------|--------------------------|--------------------------|-------------------------|
|              | NO <sub>3</sub> <sup>-</sup><br>(mM) | H <sub>2</sub> PO <sub>4</sub> <sup>-</sup><br>(mM) | SO <sub>4</sub> <sup>2-</sup><br>(mM) | HCO <sub>3</sub> <sup>-</sup><br>(mM) | Cl <sup>-</sup><br>(mM) | NH <sub>4</sub> <sup>+</sup><br>(mM) | K <sup>+</sup><br>(mM) | Ca <sup>2+</sup><br>(mM) | Mg <sup>2+</sup><br>(mM) | Na <sup>+</sup><br>(mM) |
| Muskmelon    | 12.0                                 | 2.0                                                 | 3.4                                   | 0.05                                  | 3.4                     | 1.1                                  | 5.0                    | 5.8                      | 2.0                      | 3.3                     |
| Sweet Pepper | 12.0                                 | 1.5                                                 | 2.6                                   | 1.1                                   | 3.6                     | 1.1                                  | 4.0                    | 5.8                      | 1.5                      | 3.4                     |
